# Supplementary material for: Multidecadal records of intrinsic water-use efficiency in the desert shrub Encelia farinosa reveal strong responses to climate change
Source: PubMed Central journal article supplement — Proc Natl Acad Sci U S A. 2020 Jul 27;117(31):18161–8. doi: 10.1073/pnas.2008345117 (PMC7414048; doi:10.1073/pnas.2008345117), 2020-07-27
Supplement: pnas.2008345117.sapp.pdf [file pnas.2008345117.sapp.pdf]

Supplementary Information for:

**Multi-decadal records of intrinsic water-use efficiency in the desert shrub *Encelia farinosa* reveal strong responses to climate change**

Avery W. Driscoll<sup>1\*</sup>, Nicholas Q. Bitter<sup>1</sup>, Darren R. Sandquist<sup>2</sup>, and James R. Ehleringer<sup>1</sup>

<sup>1</sup>University of Utah, School of Biological Sciences, 257 S 1400 E, Salt Lake City, UT 84112, USA

<sup>2</sup>California State University, Fullerton, Department of Biological Science, 800 North State College Blvd., Fullerton, CA

\*Corresponding author: [jim.ehleringer@utah.edu](mailto:jim.ehleringer@utah.edu)

This PDF includes:

Tables S1 to S4  
Figures S1 to S2

**Table S1.** Full results of linear regressions of mean temperature, mean daily maximum VPD, and total precipitation by year between 1981 and 2019 at the study sites. All linear regressions were conducted using function “lm” in package “stats”, version 3.6.1. Asterisks denote significance of slope and intercept terms (\*p<0.05, \*\*p<0.01, \*\*\*p<0.001).

| Site         | Climate variable | Intercept  | Slope     | Std. error (slope) | Adj. R <sup>2</sup> (model) | P (model) |
|--------------|------------------|------------|-----------|--------------------|-----------------------------|-----------|
| Death Valley | Temperature      | -53.415*** | 0.0368*** | 0.00725            | 0.394                       | <0.0001   |
| Death Valley | VPD              | -144.03**  | 0.0903*** | 0.0223             | 0.289                       | 0.00024   |
| Death Valley | Precipitation    | 3479.7*    | -1.682*   | 0.827              | 0.0762                      | 0.0492    |
| Oatman       | Temperature      | -50.837*** | 0.0361*** | 0.00689            | 0.411                       | <0.0001   |
| Oatman       | VPD              | -156.58**  | 0.0967*** | 0.0222             | 0.321                       | 0.0001    |
| Oatman       | Precipitation    | 3501.9     | -1.668    | 1.071              | 0.0361                      | 0.128     |

**Table S2.** Full results of multiple linear regressions of carbon isotope ratio by temperature, VPD, and precipitation (n = 26 for Death Valley and n = 25 for Oatman).

| Site                                            | Predictor     | Coefficient | Std. error | P (coefficient) |
|-------------------------------------------------|---------------|-------------|------------|-----------------|
| Death Valley                                    | Temperature   | -0.691      | 0.406      | 0.103           |
| Death Valley                                    | VPD           | 0.981       | 0.323      | 0.0061**        |
| Death Valley                                    | Precipitation | 0.0019      | 0.0054     | 0.724           |
| <i>Adj. R<sup>2</sup> = 0.696 P &lt; 0.0001</i> |               |             |            |                 |
| Oatman                                          | Temperature   | -0.534      | 0.397      | 0.191           |
| Oatman                                          | VPD           | 0.726       | 0.282      | 0.017*          |
| Oatman                                          | Precipitation | -0.0012     | 0.0048     | 0.811           |
| <i>Adj. R<sup>2</sup> = 0.771 P &lt; 0.0001</i> |               |             |            |                 |

**Table S3.** Full results of multiple linear regressions of iWUE by VPD and CO<sub>2</sub> concentration (n = 26 for Death Valley and n = 25 for Oatman).

| Site                                            | Predictor       | Coefficient | Std. error | P (coefficient) |
|-------------------------------------------------|-----------------|-------------|------------|-----------------|
| Death Valley                                    | CO <sub>2</sub> | 5.928       | 0.892      | <0.0001***      |
| Death Valley                                    | VPD             | 0.465       | 0.0907     | <0.0001***      |
| <i>Adj. R<sup>2</sup> = 0.796 P &lt; 0.0001</i> |                 |             |            |                 |
| Oatman                                          | CO <sub>2</sub> | 6.023       | 0.705      | <0.0001***      |
| Oatman                                          | VPD             | 0.314       | 0.0845     | 0.0012**        |
| <i>Adj. R<sup>2</sup> = 0.874 P &lt; 0.0001</i> |                 |             |            |                 |

**Table S4.** Annual summaries of raw climate, CO<sub>2</sub>, and plant data used in the analysis. Detailed descriptions of variables are provided below the table.

| Site         | Year | Max VPD | Mean temp | Max temp | Total precip. | CO <sub>2</sub> conc. | δ <sup>13</sup> CO <sub>2</sub> | Population size | Plants analyzed | Mean δ <sup>13</sup> C | Mean c <sub>i</sub> /c <sub>a</sub> | Mean iWUE |
|--------------|------|---------|-----------|----------|---------------|-----------------------|---------------------------------|-----------------|-----------------|------------------------|-------------------------------------|-----------|
| Death Valley | 1991 | 17.41   | 10.16     | 18.04    | 86.18         | 352.18                | -7.90                           | 25              | 21              | -26.10                 | 0.61                                | 85.71     |
| Death Valley | 1992 | 15.52   | 11.00     | 17.94    | 167.81        | 354.27                | -7.93                           | 879             | 69              | -27.97                 | 0.69                                | 68.24     |
| Death Valley | 1993 | 14.50   | 10.08     | 16.74    | 200.49        | 357.05                | -7.88                           | 925             | 385             | -28.27                 | 0.71                                | 65.30     |
| Death Valley | 1994 | 18.27   | 10.88     | 18.70    | 42.30         | 361.44                | -8.03                           | 921             | 71              | -25.58                 | 0.58                                | 94.44     |
| Death Valley | 1995 | 15.25   | 10.90     | 17.90    | 161.44        | 362.07                | -8.01                           | 549             | 9               | -28.03                 | 0.69                                | 69.89     |
| Death Valley | 1996 | 20.09   | 12.66     | 20.68    | 28.16         | 363.10                | -8.07                           | 510             | 7               | -25.20                 | 0.56                                | 99.09     |
| Death Valley | 1997 | 18.44   | 11.82     | 19.18    | 45.93         | 365.17                | -8.06                           | 412             | 5               | -26.42                 | 0.62                                | 87.20     |
| Death Valley | 1998 | 14.57   | 10.42     | 17.02    | 159.72        | 367.55                | -8.09                           | 320             | 280             | -27.04                 | 0.64                                | 81.85     |
| Death Valley | 1999 | 18.28   | 11.12     | 18.88    | 10.33         | 370.39                | -8.17                           | 354             | 9               | -27.65                 | 0.67                                | 77.03     |
| Death Valley | 2000 | 18.62   | 12.04     | 19.44    | 77.85         | 371.31                | -8.18                           | 309             | 0               | NA                     | NA                                  | NA        |
| Death Valley | 2001 | 15.82   | 10.32     | 17.22    | 70.39         | 373.56                | -8.20                           | 299             | 234             | -27.36                 | 0.65                                | 81.01     |
| Death Valley | 2002 | 17.61   | 10.82     | 18.18    | 4.76          | 374.72                | -8.20                           | 140             | 0               | NA                     | NA                                  | NA        |
| Death Valley | 2003 | 17.23   | 11.98     | 18.96    | 66.91         | 377.89                | -8.27                           | 124             | 100             | -26.42                 | 0.61                                | 92.43     |
| Death Valley | 2004 | 16.21   | 10.86     | 17.56    | 97.14         | 380.05                | -8.28                           | 137             | 8               | -27.71                 | 0.66                                | 79.62     |
| Death Valley | 2005 | 13.77   | 11.20     | 17.22    | 225.06        | 381.40                | -8.31                           | 146             | 9               | -29.46                 | 0.74                                | 61.70     |
| Death Valley | 2006 | 18.15   | 11.36     | 18.74    | 35.98         | 384.84                | -8.39                           | 223             | 10              | -26.15                 | 0.59                                | 98.36     |
| Death Valley | 2007 | 20.17   | 11.68     | 19.34    | 3.01          | 385.75                | -8.42                           | 144             | 10              | -24.96                 | 0.54                                | 111.51    |
| Death Valley | 2008 | 18.86   | 12.26     | 18.66    | 42.46         | 387.12                | -8.38                           | 129             | 10              | -25.42                 | 0.56                                | 106.69    |
| Death Valley | 2009 | 17.92   | 11.80     | 18.56    | 68.26         | 388.51                | -8.37                           | 126             | 9               | -25.72                 | 0.57                                | 103.72    |
| Death Valley | 2010 | 17.03   | 12.06     | 18.18    | 103.98        | 391.27                | -8.47                           | 120             | 113             | -27.22                 | 0.64                                | 89.20     |
| Death Valley | 2011 | 16.17   | 10.92     | 17.78    | 66.65         | 393.69                | -8.44                           | 120             | 10              | -27.70                 | 0.66                                | 84.20     |
| Death Valley | 2012 | 17.70   | 10.60     | 18.22    | 12.44         | 395.84                | -8.48                           | 115             | 25              | -25.82                 | 0.57                                | 105.73    |
| Death Valley | 2013 | 18.30   | 11.18     | 18.42    | 27.57         | 399.26                | -8.56                           | 102             | 35              | -24.78                 | 0.52                                | 119.08    |
| Death Valley | 2014 | 19.72   | 12.26     | 19.62    | 37.59         | 400.23                | -8.53                           | 80              | 32              | -24.01                 | 0.49                                | 127.53    |
| Death Valley | 2015 | 20.05   | 13.42     | 20.36    | 58.38         | 403.29                | -8.59                           | 65              | 32              | -25.74                 | 0.56                                | 109.83    |
| Death Valley | 2016 | 17.69   | 11.22     | 18.12    | 41.55         | 405.66                | -8.62                           | 57              | 53              | -27.27                 | 0.63                                | 93.67     |
| Death Valley | 2017 | 17.62   | 12.26     | 18.60    | 86.49         | 409.07                | -8.65                           | 180             | 0               | NA                     | NA                                  | NA        |
| Death Valley | 2018 | 18.77   | 12.46     | 19.30    | 33.76         | 411.91                | -8.68                           | 170             | 113             | -25.62                 | 0.55                                | 114.60    |
| Death Valley | 2019 | 15.36   | 10.60     | 16.86    | 86.61         | 410.73                | -8.68                           | 134             | 35              | -26.52                 | 0.59                                | 103.98    |
| Oatman       | 1991 | 18.40   | 12.38     | 19.20    | 138.31        | 352.18                | -7.90                           | 193             | 160             | -25.62                 | 0.59                                | 90.42     |
| Oatman       | 1992 | 16.44   | 12.96     | 19.18    | 228.27        | 354.27                | -7.93                           | 357             | 8               | -28.61                 | 0.72                                | 61.93     |
| Oatman       | 1993 | 14.81   | 12.04     | 17.78    | 268.69        | 357.05                | -7.88                           | 387             | 246             | -28.54                 | 0.72                                | 62.54     |
| Oatman       | 1994 | 19.04   | 12.64     | 19.50    | 71.53         | 361.44                | -8.03                           | 389             | 8               | -25.23                 | 0.57                                | 97.96     |
| Oatman       | 1995 | 15.42   | 12.54     | 18.34    | 175.91        | 362.07                | -8.01                           | 327             | 9               | -28.23                 | 0.70                                | 67.87     |
| Oatman       | 1996 | 21.47   | 14.92     | 21.76    | 23.74         | 363.10                | -8.07                           | 326             | 0               | NA                     | NA                                  | NA        |
| Oatman       | 1997 | 19.88   | 13.98     | 20.40    | 81.33         | 365.17                | -8.06                           | 252             | 8               | -26.21                 | 0.61                                | 89.37     |
| Oatman       | 1998 | 16.58   | 12.44     | 18.46    | 176.94        | 367.55                | -8.09                           | 181             | 155             | -27.13                 | 0.65                                | 80.94     |
| Oatman       | 1999 | 20.66   | 13.66     | 20.56    | 35.28         | 370.39                | -8.17                           | 217             | 6               | -24.80                 | 0.54                                | 106.30    |
| Oatman       | 2000 | 21.84   | 14.48     | 21.16    | 41.06         | 371.31                | -8.18                           | 225             | 0               | NA                     | NA                                  | NA        |
| Oatman       | 2001 | 17.20   | 12.30     | 18.48    | 93.28         | 373.56                | -8.20                           | 192             | 160             | -27.62                 | 0.66                                | 78.36     |
| Oatman       | 2002 | 19.99   | 12.90     | 19.56    | 9.81          | 374.72                | -8.20                           | 183             | 0               | NA                     | NA                                  | NA        |
| Oatman       | 2003 | 18.59   | 13.88     | 20.14    | 117.89        | 377.89                | -8.27                           | 64              | 58              | -27.08                 | 0.64                                | 85.63     |
| Oatman       | 2004 | 18.46   | 13.00     | 19.22    | 63.22         | 380.05                | -8.28                           | 115             | 7               | -26.60                 | 0.62                                | 91.20     |
| Oatman       | 2005 | 13.84   | 12.34     | 17.74    | 240.99        | 381.40                | -8.31                           | 128             | 8               | -28.31                 | 0.69                                | 73.79     |
| Oatman       | 2006 | 20.97   | 13.54     | 20.38    | 16.42         | 384.84                | -8.39                           | 200             | 9               | -25.67                 | 0.57                                | 103.41    |
| Oatman       | 2007 | 21.58   | 13.50     | 20.44    | 24.21         | 385.75                | -8.42                           | 131             | 6               | -24.30                 | 0.51                                | 118.63    |
| Oatman       | 2008 | 19.21   | 12.82     | 19.28    | 94.02         | 387.12                | -8.38                           | 91              | 9               | -25.67                 | 0.57                                | 103.93    |
| Oatman       | 2009 | 18.98   | 13.38     | 19.72    | 99.18         | 388.51                | -8.37                           | 171             | 9               | -26.13                 | 0.59                                | 99.27     |
| Oatman       | 2010 | 17.13   | 12.46     | 18.64    | 157.91        | 391.27                | -8.47                           | 104             | 94              | -27.76                 | 0.66                                | 83.44     |
| Oatman       | 2011 | 18.00   | 12.64     | 18.96    | 88.37         | 393.69                | -8.44                           | 105             | 9               | -27.10                 | 0.63                                | 90.80     |
| Oatman       | 2012 | 19.15   | 12.80     | 19.46    | 29.22         | 395.84                | -8.48                           | 123             | 9               | -25.50                 | 0.56                                | 109.21    |
| Oatman       | 2013 | 19.82   | 13.02     | 19.60    | 60.86         | 399.26                | -8.56                           | 168             | 10              | -25.18                 | 0.54                                | 114.64    |
| Oatman       | 2014 | 21.76   | 14.34     | 21.14    | 25.07         | 400.23                | -8.53                           | 151             | 8               | -25.50                 | 0.56                                | 111.03    |

|        |      |       |       |       |        |        |       |     |     |        |      |        |
|--------|------|-------|-------|-------|--------|--------|-------|-----|-----|--------|------|--------|
| Oatman | 2015 | 21.15 | 15.04 | 21.38 | 81.58  | 403.29 | -8.59 | 142 | 10  | -25.03 | 0.53 | 117.79 |
| Oatman | 2016 | 20.29 | 13.48 | 19.86 | 43.12  | 405.66 | -8.62 | 143 | 140 | -25.78 | 0.56 | 110.40 |
| Oatman | 2017 | 19.11 | 14.24 | 20.08 | 118.31 | 409.07 | -8.65 | 171 | 167 | -27.15 | 0.62 | 96.20  |
| Oatman | 2018 | 21.07 | 14.76 | 20.96 | 27.50  | 411.91 | -8.68 | 136 | 24  | -24.86 | 0.52 | 123.25 |
| Oatman | 2019 | 16.82 | 12.58 | 18.20 | 92.81  | 410.73 | -8.68 | 27  | 0   | NA     | NA   | NA     |

Definitions and details of variables provided in Table S4:

|                                                             |                                                                                                                                                                                                                                             |
|-------------------------------------------------------------|---------------------------------------------------------------------------------------------------------------------------------------------------------------------------------------------------------------------------------------------|
| <b>Max VPD<sup>1</sup></b>                                  | The average of the daily maximum vapor pressure deficit (kPa) over the growing season (November through March of the sampling year).                                                                                                        |
| <b>Mean temp<sup>1</sup></b>                                | The average of the daily mean temperature (degrees C) over the growing season (November through March of the sampling year).                                                                                                                |
| <b>Max temp<sup>1</sup></b>                                 | The average of the daily maximum temperature (degrees C) over the growing season (November through March of the sampling year).                                                                                                             |
| <b>Total precipitation<sup>1</sup></b>                      | Total precipitation (mm) over the growing season (November through March of the sampling year).                                                                                                                                             |
| <b>CO<sub>2</sub> concentration<sup>2</sup></b>             | The atmospheric concentration of CO <sub>2</sub> (ppm) in Wendover, NV. Values for 1991, 1992, and 2019 were estimated using the linear regression between CO <sub>2</sub> and year from 1993-2018.                                         |
| <b>δ<sup>13</sup>C<sub>CO<sub>2</sub></sub><sup>2</sup></b> | The δ <sup>13</sup> C value of atmospheric CO <sub>2</sub> in Wendover, NV. Values for 1991, 1992, and 2015-2019 were estimated using the linear regression between the δ <sup>13</sup> C value of CO <sub>2</sub> and year from 1993-2014. |
| <b>Population size</b>                                      | The number of plants in the population. A plant must look dead for 3 consecutive years in order to be considered dead, so the population sizes for 2018 and 2019 are preliminary.                                                           |
| <b>Plants analyzed</b>                                      | The number of plants whose δ <sup>13</sup> C values were analyzed from the sampling year.                                                                                                                                                   |
| <b>Mean δ<sup>13</sup>C</b>                                 | The average δ <sup>13</sup> C value of all plants that were analyzed within the sampling year.                                                                                                                                              |
| <b>Mean c<sub>i</sub>/c<sub>a</sub></b>                     | The average ratio of c <sub>i</sub> to c <sub>a</sub> of all plants that were analyzed within the sampling year (see Equation 1 in Methods).                                                                                                |
| <b>Mean iWUE</b>                                            | The average iWUE value of all plants that were analyzed within the sampling year (see Equation 2 in Methods).                                                                                                                               |

<sup>1</sup>Data from the PRISM Climate Group. See "Climate data" in Methods for details.

<sup>2</sup>Data from NOAA ESRL. See "δ<sup>13</sup>C value and concentration of atmospheric CO<sub>2</sub>" in Methods for details.

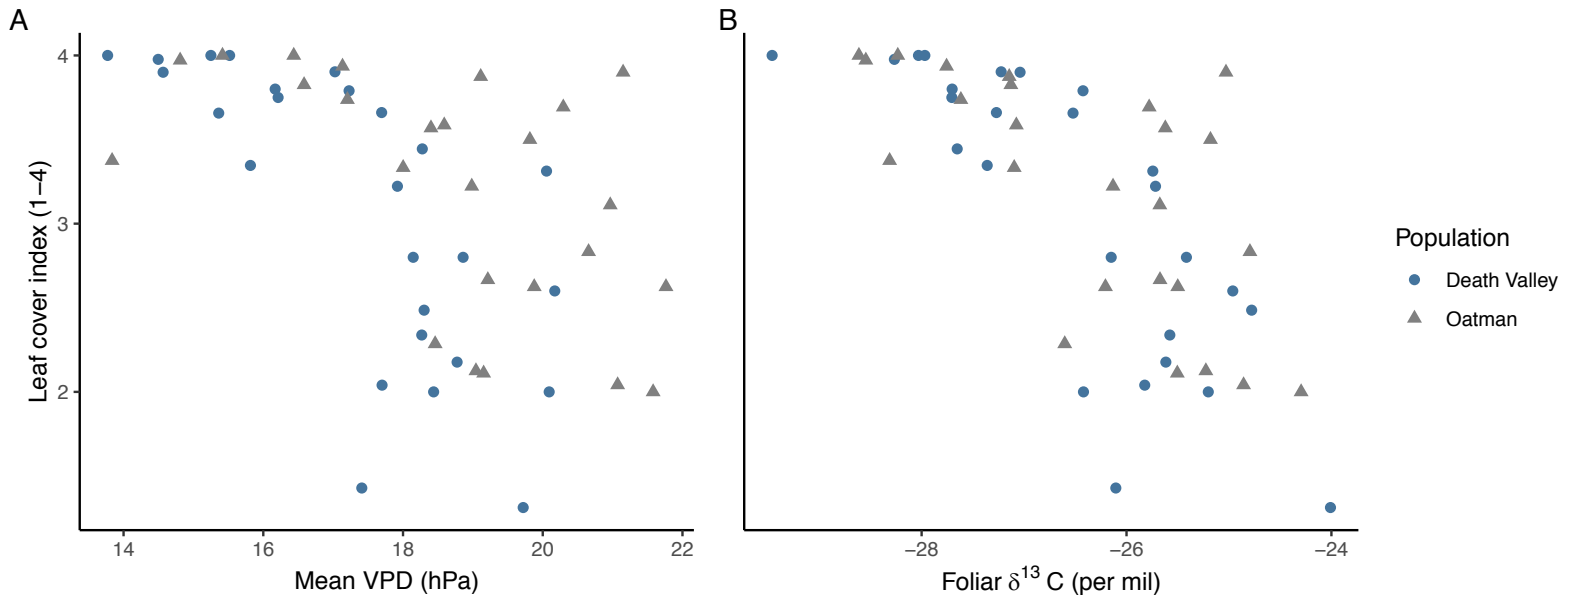

**Figure S1.** Population mean leaf cover is negatively and non-linearly associated with VPD (A) and  $\delta^{13}\text{C}$  values (B) for both the Death Valley population (blue circles) and Oatman population (grey triangles). The proportion of each plant that was covered in leaves was estimated on a 1-4 scale, where values of 1 correspond with 1-25% leaf cover, 2 with 26-50%, 3 with 51-75%, and 4 with 76-100%. Generalized additive models (function “gam” in package “mgcv”) of leaf cover by  $\delta^{13}\text{C}$  values explained 69.6% of the deviance in leaf cover for Death Valley (edf = 1.70,  $p < 0.001$  for smoothing and parametric terms) and 44.7% for Oatman (edf = 1.23,  $p < 0.001$  for smoothing and parametric terms).

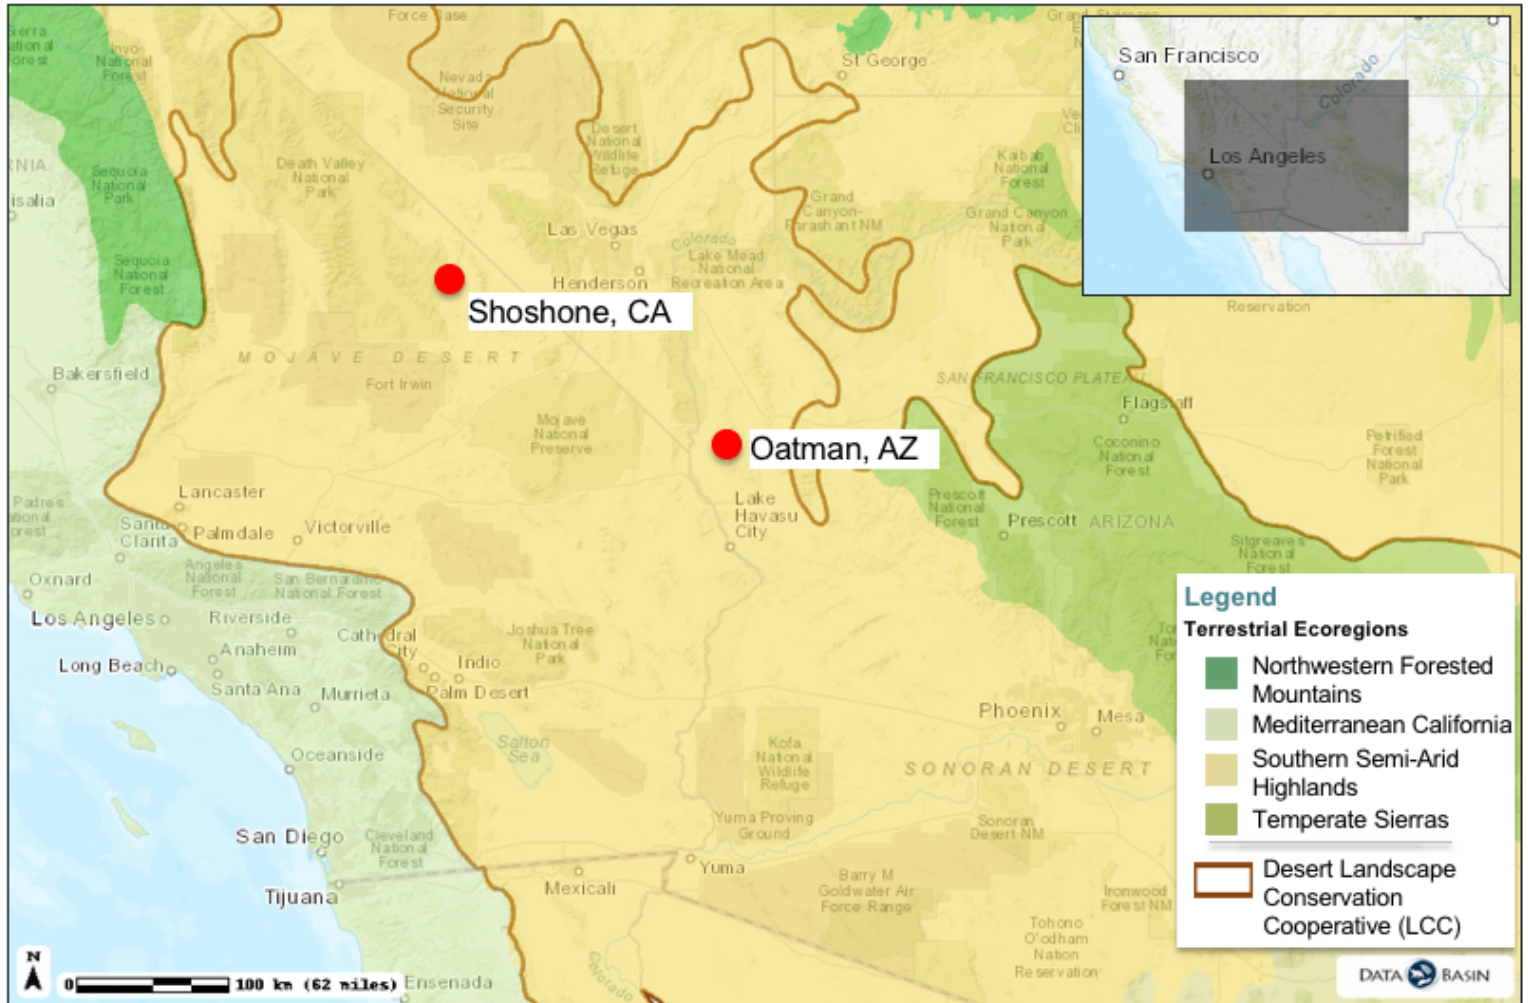

Credits: U.S. Fish and Wildlife Service, Commission for Environmental Cooperation, Desert Landscape Conservation Cooperative (LCC)  
 Created Jan. 24, 2020; data published September, 2004.  
 Retrieved from: [dlcc.databasin.org/datasets](http://dlcc.databasin.org/datasets)

**Figure S2.** Map of the U.S. desert Southwest showing the approximate locations of the study sites in the Mojave Desert.
